# Supplementary material for: Biochemical Characterization of the GBA2 c.1780G>C Missense Mutation in Lymphoblastoid Cells from Patients with Spastic Ataxia
Source: MDPI journal article supplement (doi:10.3390/ijms19103099), 2018-10-10
Supplement: s1 [file s1]

Supplementary Figure 1

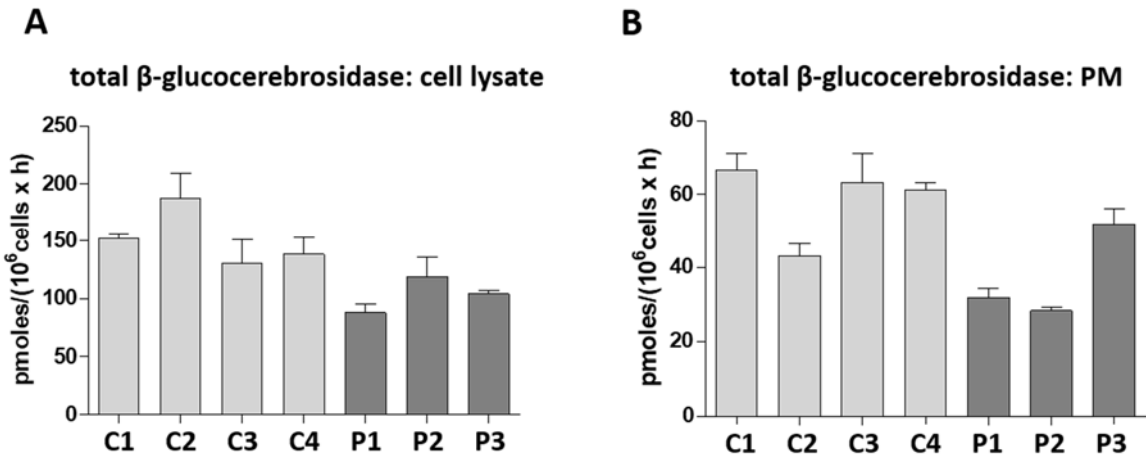

Figure S1. Total  $\beta$ -glucocerebrosidase activity A) Total  $\beta$ -glucocerebrosidase activity associated with the total cell lysates and B) of plasma membrane (PM) of controls (light grey) and patients derived LCLs (dark grey). Enzymatic activity was expressed as pmoles/10<sup>6</sup> cells/h. Data are expressed as mean $\pm$ SD of three independent triplicate experiments.
